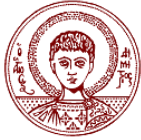

ARISTOTLE  
UNIVERSITY OF  
THESSALONIKI

FACULTY OF HEALTH SCIENCES • DEPARTMENT OF MEDICINE •  
LABORATORY OF HYGIENE, SOCIAL & PREVENTIVE MEDICINE & MEDICAL STATISTICS

**Michael Chourdakis**, *Associate Professor of Medical Nutrition – Hygiene*  
Director of Postgraduate Program "[Applied Nutrition and Health Promotion](#)"

☎ +30 2310 999035 | E-mail [mhourd@gapps.auth.gr](mailto:mhourd@gapps.auth.gr)  
✉ University Campus, Thessaloniki, GR-54124, Greece

---

**Title:** Is vitamin D deficiency associated with the COVID-19 epidemic in Europe?

**Authors:** Dimitra Rafailia Bakaloudi, Michail Chourdakis

**ID:** MEDRXIV/2021/250673

The authors have withdrawn this manuscript because, following comments received during the review process, they have updated the number of countries included in their study (and also changed from 5 to 10 years the limit for Vit-D information studies that they included), which led to non-significant correlations between mortality and infections and Vit D deficiency prevalence. Therefore, the authors do not wish this work to be cited as reference for the project. If you have any questions, please contact the corresponding author.
